# Supplementary material
Source: PubMed Central journal article supplement (PMC4611509)
Supplement: ismej201556x1.pdf [file ismej201556x1.pdf]

# Supplementary Information

## **Altitudinal patterns of diversity and functional traits of metabolically active microorganisms in stream biofilms**

Linda Wilhelm<sup>1</sup>, Katharina Besemer<sup>2</sup>, Lena Fragner<sup>3</sup>, Hannes Peter<sup>4</sup>, Wolfram Weckwerth<sup>3</sup> and Tom J. Battin<sup>1,5,§</sup>

<sup>1</sup> Department of Limnology and Oceanography, Faculty of Life Sciences, University of Vienna, A-1090 Vienna, Austria

<sup>2</sup> School of Engineering, University of Glasgow, Glasgow G12 8QQ, UK,

<sup>3</sup> Department of Ecogenomics and Systems Biology, University of Vienna, A-1090 Vienna Austria

<sup>4</sup> Lake and Glacier Ecology Research Group, Institute of Ecology, University of Innsbruck, Innsbruck, Austria

<sup>5</sup> Stream Biofilm and Ecosystem Research Laboratory, School of Architecture, Ecole Polytechnique Fédérale de Lausanne, CH-1015 Lausanne, Switzerland

§ Corresponding author: tom.battin@epfl.ch

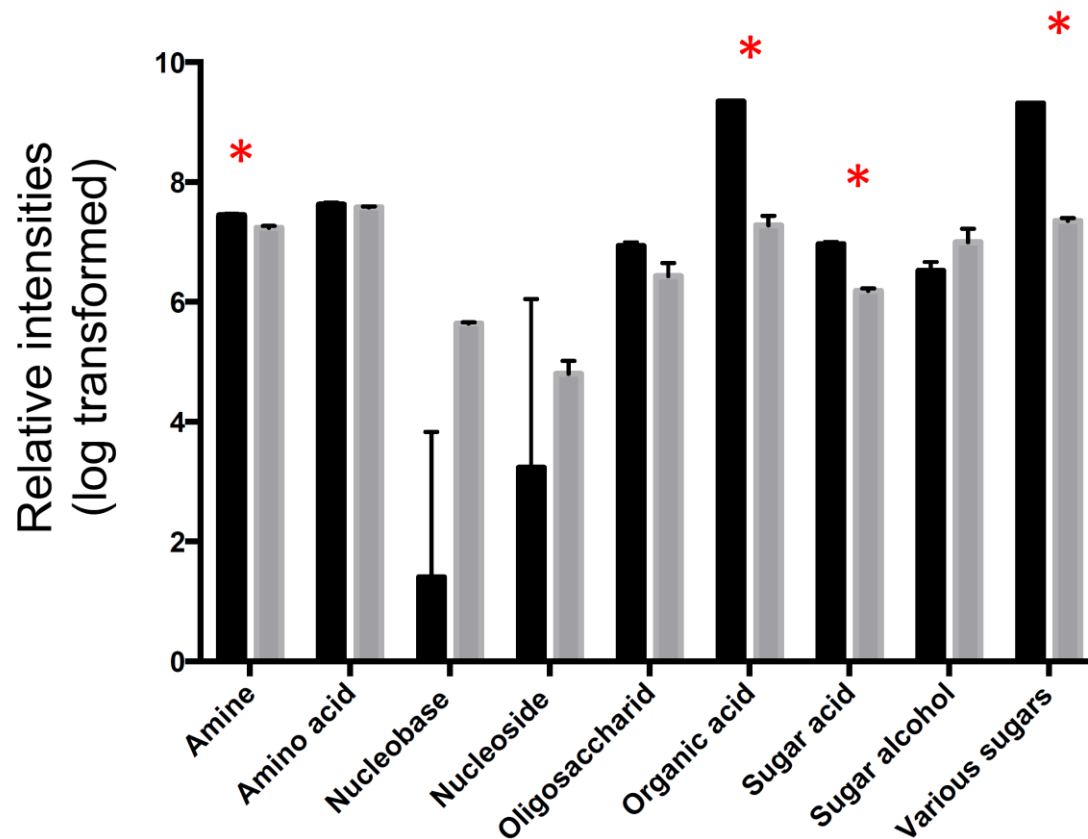

**Figure 1.** Chemical composition of the model allochthonous (spruce) and autochthonous (algae) carbon sources. Black bars represent spruce treatment and grey bars represent algae treatment. Red asterisks describe significant differences ( $P < 0.05$ ) between spruce and algae substrate.

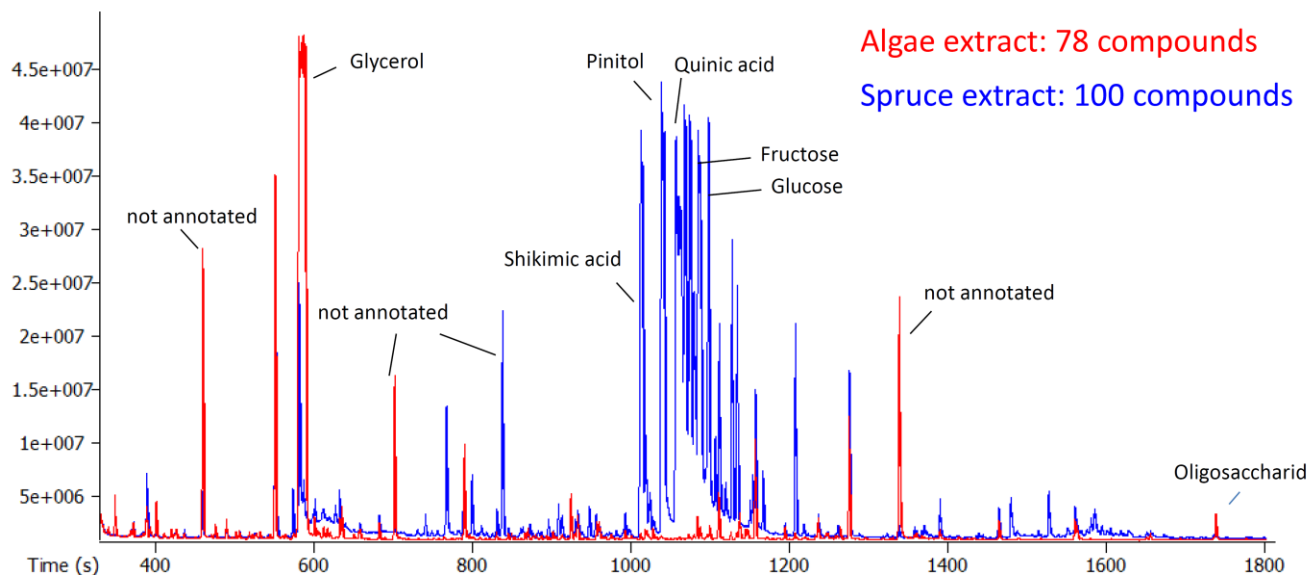

**Figure 2.** Chromatogram of the spruce and algal extract displaying a strong difference in their chemical composition. Red line = algal extract, blue line = spruce extract. Both extracts were measured at the same concentration in triplicates, while only one representative chromatogram is shown here.

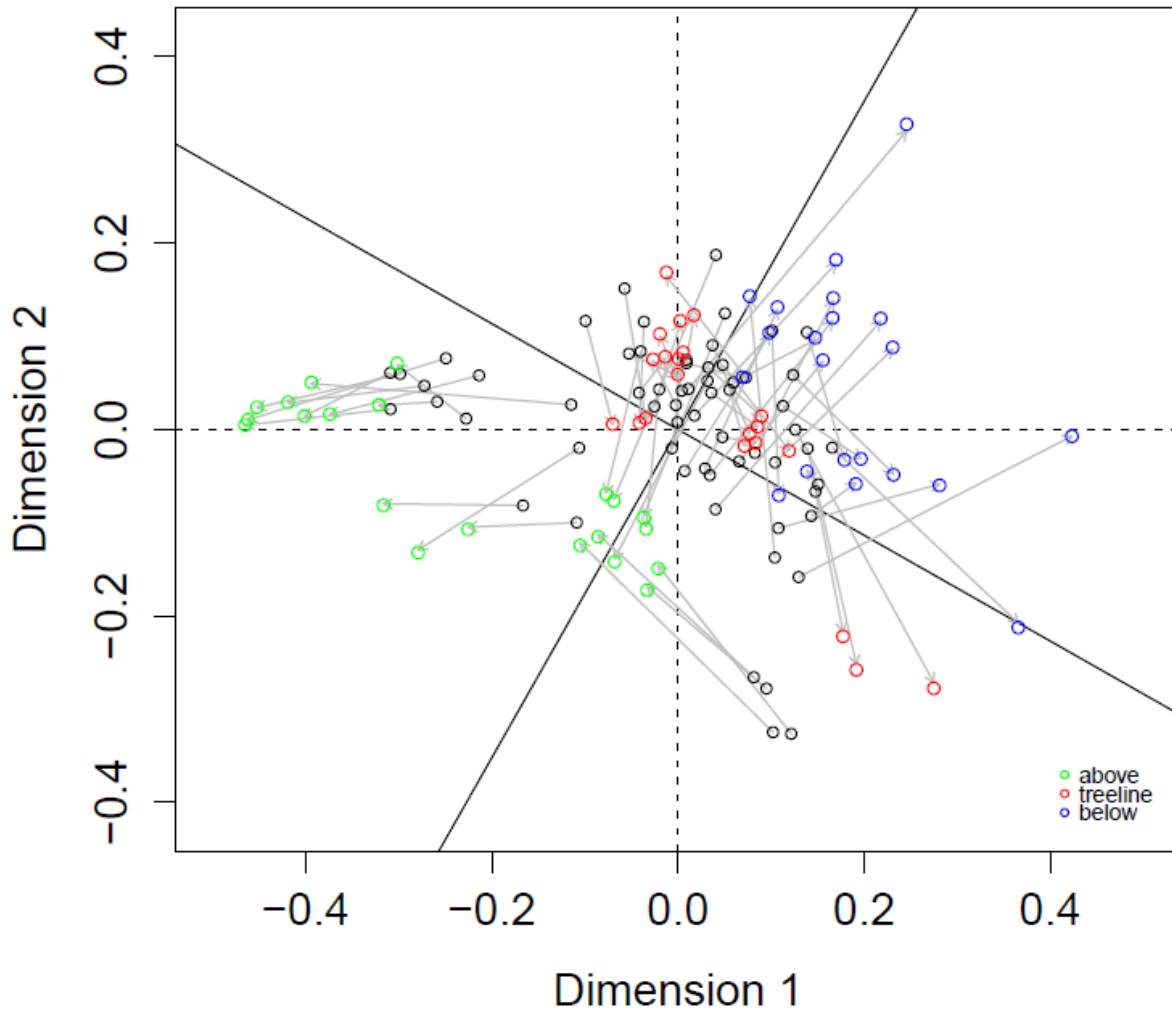

**Figure 3.** Procrustes rotation showing the associations between biofilm bacterial community and metabolic orthologue similarity based on the relative abundance-based Horn distance for all samples. In the procrustes analysis, two ordinations (here nMDS using the metaMDS function in R's vegan package) are scaled and rotated in a way to optimally preserve the structure of the two ordinations. The rotation is indicated by the secondary axis, while an arrow links the same sample in the two ordinations. Black circles depict the patterns of community composition while color-coded circles indicate the functional composition based on the PICRUST analysis. The altitudinal gradient can be observed in both ordinations, however is even more pronounced in the nMDS based on metabolic functional orthologues.

**Table 1. Environmental characteristics of the study streams at the start (grey fields) and at the end (white fields) of the experiment.** 1, 2 and 3 in site description refers to above, around and below treeline, respectively.

| Sites | Altitude (m.a.s.) | Temperature (°C) |      | Conductivity ( $\mu\text{S cm}^{-1}$ ) |      | pH  |     | Nitrate ( $\mu\text{g l}^{-1}$ ) |     | DOC (ppb) |     | Cell counts ( $\times 10^6$ cells $\text{cm}^{-2}$ ) |
|-------|-------------------|------------------|------|----------------------------------------|------|-----|-----|----------------------------------|-----|-----------|-----|------------------------------------------------------|
| OTB1  | 1850              | 9.4              | 8.1  | 10.8                                   | 46.6 | 6.6 | 7.6 | 34                               | 144 | 720       | 293 | 10.8 $\pm$ 2.3                                       |
| OTB2  | 1651              | 10.1             | 10.9 | 45.0                                   | 50.6 | 7.3 | 7.6 | 164                              | 147 | 615       | 552 | 22.6 $\pm$ 5.0                                       |
| OTB3  | 1214              | 11.1             | 11.3 | 46.1                                   | 52.3 | 7.4 | 7.5 | 197                              | 206 | 511       | 549 | 13.2 $\pm$ 2.6                                       |
| SRB1  | 2062              | 12.1             | 14.5 | 16.2                                   | 24.0 | 7.0 | 7.4 | 122                              | 85  | 396       | 395 | 4.2 $\pm$ 4.0                                        |
| SRB2  | 1656              | 4.8              | 6.3  | 48.7                                   | 52.8 | 7.0 | 7.4 | 294                              | 240 | 268       | 150 | 7.4 $\pm$ 2.6                                        |
| SRB3  | 1114              | 10.9             | 9.9  | 45.4                                   | 50.7 | 7.2 | 7.5 | 382                              | 379 | 521       | 458 | 8.1 $\pm$ 2.2                                        |
| RB1   | 2275              | 2.5              | 15.8 | 3.9                                    | 5.9  | 5.5 | 6.8 | 132                              | 120 | 286       | 395 | 5.2 $\pm$ 1.7                                        |
| RB2   | 1670              | 8.8              | 12.7 | 14.8                                   | 18.0 | 6.7 | 7.3 | 171                              | 161 | 511       | 447 | 5.0 $\pm$ 0.7                                        |
| RB3   | 1130              | 13.8             | 15.7 | 30.3                                   | 37.0 | 7.0 | 7.6 | 224                              | 217 | 849       | 865 | 21.4 $\pm$ 3.2                                       |

## Detailed description of the metabolic multifunctionality analysis

We assessed metabolic functional traits based on 16S rRNA marker genes using ‘Phylogenetic Investigation of Communities by Reconstruction of Unobserved States’, PICRUSt, (Langille *et al.*, 2013), which uses the sequenced relatives and ancestral state reconstruction for microorganisms for which no genome sequence is available. For this, the 16S rRNA sequences are first aligned with the Greengenes database currently including more than 200,000 bacterial sequences and 2,590 fully sequenced genomes. The PICRUSt algorithm then predicts the metagenome, which is adjusted for 16S rRNA gene copy number and OTU abundance to produce the KEGG (Kyoto Encyclopedia of Genes and Genomes) functions of the community. Based on 140 orthologues related to carbohydrate and amino acid metabolism we assessed metabolic multifunctionality and by relating multifunctionality to diversity we estimate multifunctional redundancy (Miki *et al.*, 2013). Metabolic orthologue diversity was computed as Shannon diversity, which represents the potential range of metabolic functions of the community accounting for gene copy number. Multifunctional redundancy was derived from a power-law function ( $MF = cOR^\alpha$ ) describing the orthologue accumulation curve, which is the graph of the orthologue number (i.e., MF) as a function of rarefied OTU richness in the community (Miki *et al.*, 2013). The coefficient  $\alpha$  serves as a multifunctional redundancy index with lower values indicating larger multifunctional redundancy (Miki *et al.*, 2013).

**Model summary and confident intervals for non-linear regressions between rarified species diversity (Shannon Index) and multifunctionality (metabolic orthologue diversity (Shannon Index)).**

**above treeline**

formula: multifunctionality ~ b \* rarified species diversity^z

| parameters: | estimate | confident intervals |        | std. error | t value | Pr(> t )     |
|-------------|----------|---------------------|--------|------------|---------|--------------|
|             |          | 2.5%                | 97.5%  |            |         |              |
| b           | 4.3475   | 4.3267              | 4.3684 | 0.0099     | 436.498 | < 2e-16 ***  |
| z           | 0.0046   | 0.0036              | 0.0056 | 0.0004     | 9.864   | 6.56e-09 *** |

-----  
 residual standard error: 0.0045 on 19 degrees of freedom  
 number of iterations to convergence: 14  
 achieved convergence tolerance: 7.785e-07

**around treeline**

formula: multifunctionality ~ b \* rarified species diversity^z

| parameters: | estimate | confident intervals |        | std. error | t value | Pr(> t )     |
|-------------|----------|---------------------|--------|------------|---------|--------------|
|             |          | 2.5%                | 97.5%  |            |         |              |
| b           | 4.3585   | 4.3316              | 4.3856 | 0.0129     | 337.966 | < 2e-16 ***  |
| z           | 0.0041   | 0.0030              | 0.0052 | 0.0005     | 7.568   | 3.78e-07 *** |

-----  
 residual standard error: 0.0033 on 19 degrees of freedom  
 number of iterations to convergence: 22  
 achieved convergence tolerance: 1.257e-06

**below treeline**

formula: multifunctionality ~ b \* rarified species diversity^z

| parameters: | estimate | confident intervals |        | std. error | t value | Pr(> t )     |
|-------------|----------|---------------------|--------|------------|---------|--------------|
|             |          | 2.5%                | 97.5%  |            |         |              |
| b           | 4.3488   | 4.3097              | 4.3883 | 0.0188     | 231.780 | 2e-16 ***    |
| z           | 0.0045   | 0.0030              | 0.0061 | 0.0007     | 6.033   | 8.37e-06 *** |

-----  
 residual standard error: 0.0031 on 19 degrees of freedom  
 number of iterations to convergence: 28  
 achieved convergence tolerance: 1.018e-06

Signif. codes: 0 '\*\*\*' 0.001 '\*\*' 0.01 '\*' 0.05 '.' 0.1 ' ' 1

## References

1. Langille MGI, Zaneveld J, Caporaso JG, McDonald D, Knights D, Reyes JA *et al.* (2013). Predictive functional profiling of microbial communities using 16S rRNA marker gene sequences. *Nat Biotech* **31**: 814-821.
2. Miki T, Yokokawa T, Matsui K. (2014). Biodiversity and multifunctionality in a microbial community: a novel theoretical approach to quantify functional redundancy. *Proc R Soc B* **281**: 20132498.
